# Supplementary material for: Genome-Wide Association Studies Prioritize Genes Controlling Seed Size and Reproductive Period Length in Soybean
Source: MDPI journal article supplement (doi:10.3390/plants13050615), 2024-02-23
Supplement: s1 [file s1]

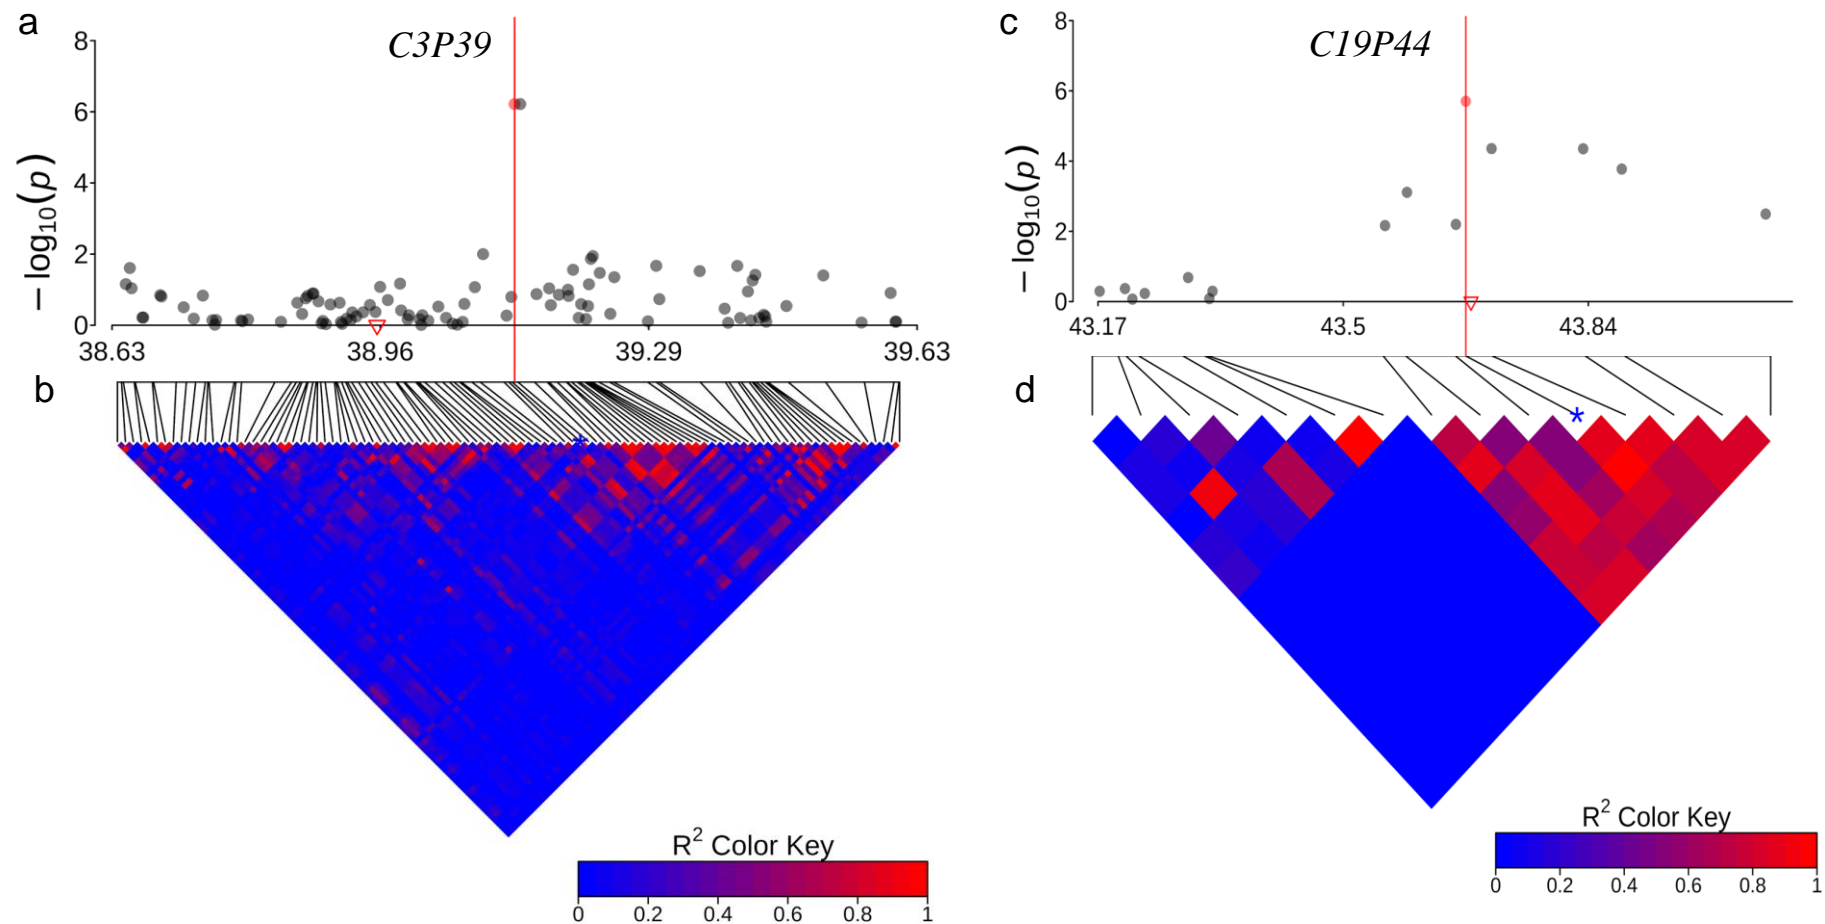

**Figure S1 The regional association for *C3P39* and *C19P44*.** a) The regional association for *C3P39* and b) the LD heatmap for the region of *C3P39*. c) The regional association for *C19P44* and d) the LD heatmap for the region of *C19P44*. the red triangle represents the candidate gene.

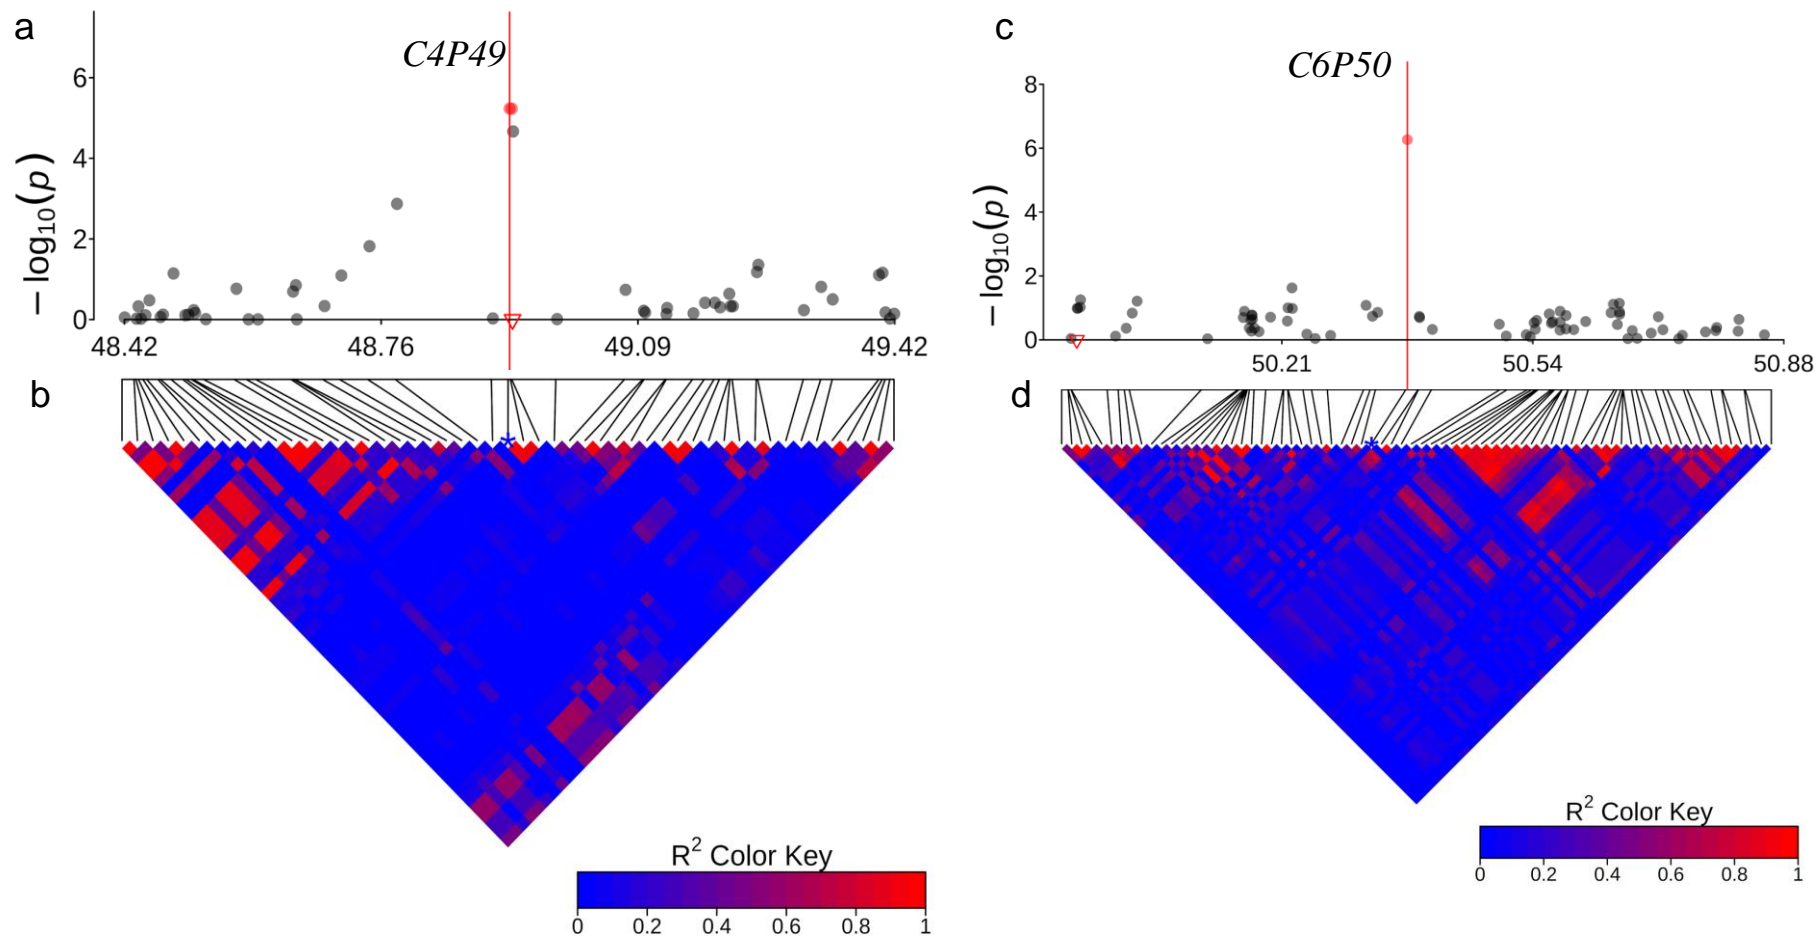

**Figure S2 The regional association for *C4P49* and *C6P50*.** a) The regional association for *C4P49* and b) the LD heatmap for the region of *C4P49*. c) The regional association for *C6P50* and d) the LD heatmap for the region of *C6P50*. The red triangle represents the candidate gene.

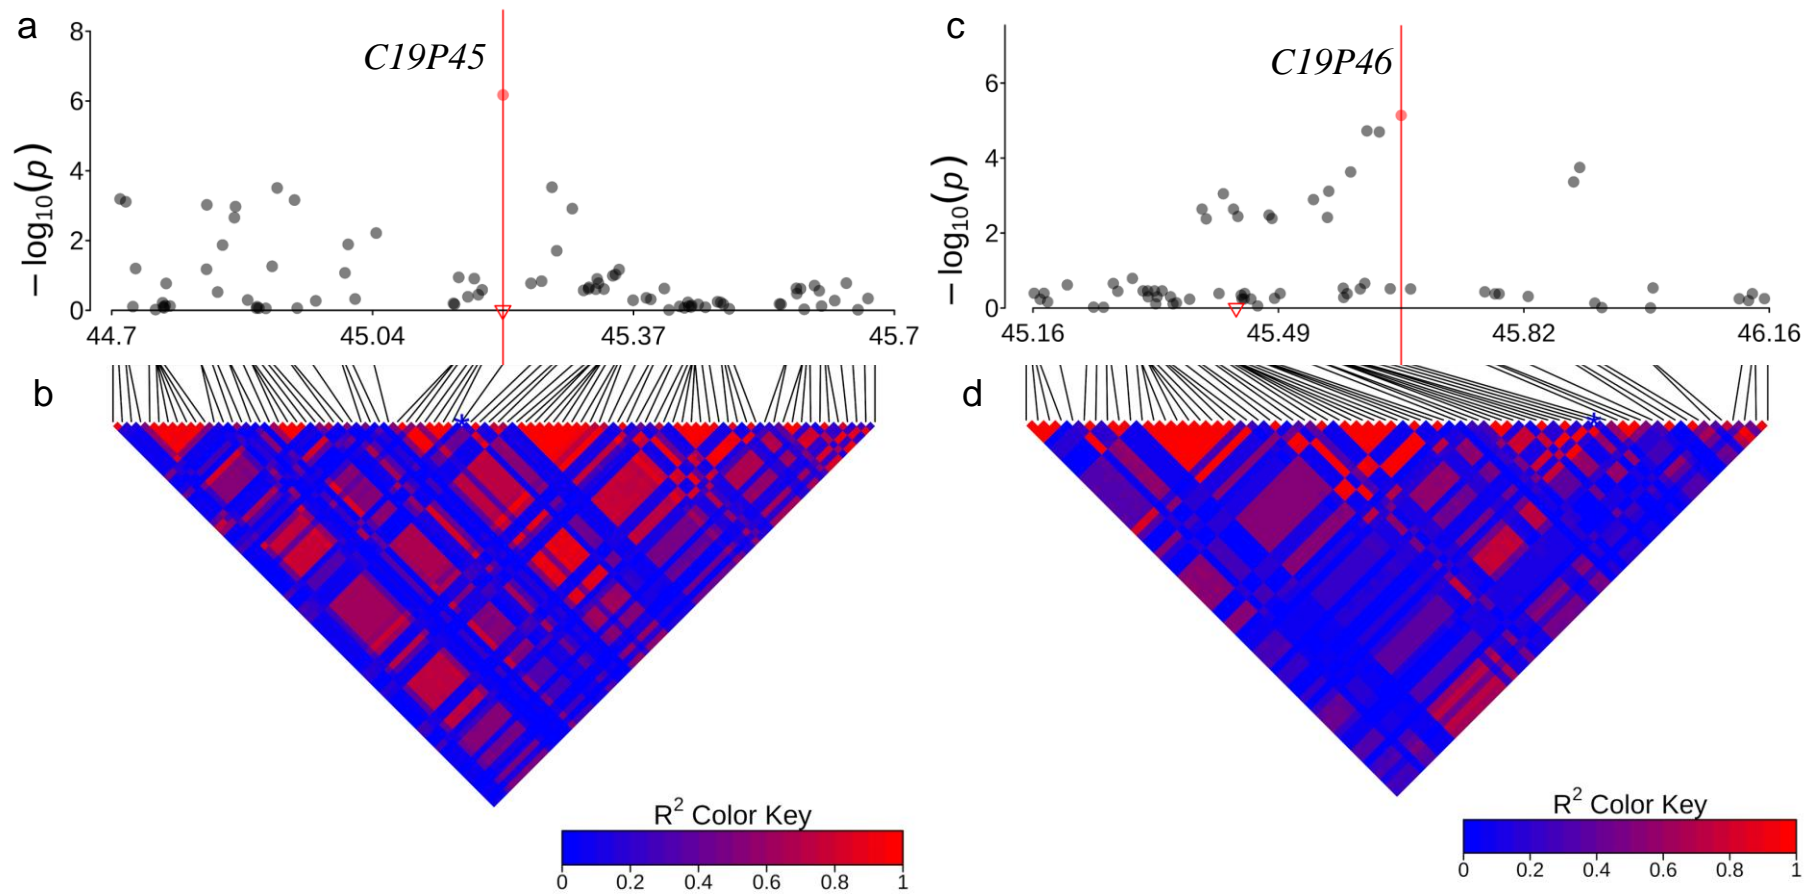

**Figure S3 The regional association for *C19P45* and *C19P46*.** a) The regional association for *C19P45* and b) the LD heatmap for the region of *C19P45*. c) The regional association for *C19P46* and d) the LD heatmap for the region of *C19P46*. The red triangle represents the candidate gene.
