# Supplementary material for: Genome-Wide Association Studies Prioritize Genes Controlling Seed Size and Reproductive Period Length in Soybean
Source: Plants (Basel). 2024 Feb 23;13(5):615. doi: 10.3390/plants13050615 (PMC10933924; doi:10.3390/plants13050615)
Supplement: Supplementary file 1 [file plants-13-00615-s001.zip › Supplimentary_Tables_R1.xlsx]

## Sheet: Table_S1
Table S1 The information for the environments and the abbreviations used in the study
phenotype method	Abbreviation	Locaition	Year	accession number	Accession number of GWAS	Traits		phenotype method	Abbreviation	Locaition	Year	accession number	Traits		phenotype method	Abbreviation	Locaition	Year	accession number	Traits
DEVELOPER.DATA	DEVELOPER.DATA			2	NA	Hundrad seed weight		SOJA.EVALUATION.IL989	IL989	Urbana, IL	1998-1999	466	Flowering date		DEVELOPER.DATA	DEVELOPER.DATA			2	Maturity date
SOYBEAN.EVALUATION.1IL64	1IL64	Urbana, IL	1964	724	724	Hundrad seed weight		SOJA.EVALUATION.MS989	MS989	Stoneville, MS	1998-1999	610	Flowering date		SOJA.EVALUATION.IL989	IL989	Urbana, IL	1998-1999	466	Maturity date
SOYBEAN.EVALUATION.1IL66	1IL66	Urbana, IL	1965-1966	1145	1145	Hundrad seed weight		SOYBEAN.EVALUATION.1IL64	1IL64	Urbana, IL	1964	724	Flowering date		SOJA.EVALUATION.MS989	MS989	Stoneville, MS	1998-1999	610	Maturity date
SOYBEAN.EVALUATION.1MN63	1MN63	St, Paul, MN	1963	287	287	Hundrad seed weight		SOYBEAN.EVALUATION.1IL66	1IL66	Urbana, IL	1965-1966	1145	Flowering date		SOYBEAN.EVALUATION.1IL64	1IL64	Urbana, IL	1964	724	Maturity date
SOYBEAN.EVALUATION.2IL81.1	2IL81.1	Urbana, IL	1980-1981	853	847	Hundrad seed weight		SOYBEAN.EVALUATION.1MN63	1MN63	St, Paul, MN	1963	287	Flowering date		SOYBEAN.EVALUATION.1IL66	1IL66	Urbana, IL	1965-1966	1143	Maturity date
SOYBEAN.EVALUATION.2IL81.2	2IL81.2	Urbana, IL	1980-1981	786	784	Hundrad seed weight		SOYBEAN.EVALUATION.2IL81.1	2IL81.1	Urbana, IL	1980-1981	853	Flowering date		SOYBEAN.EVALUATION.1MN63	1MN63	St, Paul, MN	1963	287	Maturity date
SOYBEAN.EVALUATION.2KY81	2KY81	Lexington,KY	1980-1981	788	785	Hundrad seed weight		SOYBEAN.EVALUATION.2IL81.2	2IL81.2	Urbana, IL	1980-1981	786	Flowering date		SOYBEAN.EVALUATION.2IL81.1	2IL81.1	Urbana, IL	1980-1981	853	Maturity date
SOYBEAN.EVALUATION.2MN81	2MN81	st, Paul, MN	1980-1981	364	362	Hundrad seed weight		SOYBEAN.EVALUATION.2KY81	2KY81	Lexington,KY	1980-1981	789	Flowering date		SOYBEAN.EVALUATION.2IL81.2	2IL81.2	Urbana, IL	1980-1981	786	Maturity date
SOYBEAN.EVALUATION.3IL83.1	3IL83.1	Urbana, IL	1982-1983	625	625	Hundrad seed weight		SOYBEAN.EVALUATION.2MN81	2MN81	st, Paul, MN	1980-1981	364	Flowering date		SOYBEAN.EVALUATION.2KY81	2KY81	Lexington,KY	1980-1981	789	Maturity date
SOYBEAN.EVALUATION.3IL83.2	3IL83.2	Urbana, IL	1982-1983	192	NA	Hundrad seed weight		SOYBEAN.EVALUATION.3IL83.1	3IL83.1	Urbana, IL	1982-1983	625	Flowering date		SOYBEAN.EVALUATION.2MN81	2MN81	st, Paul, MN	1980-1981	364	Maturity date
SOYBEAN.EVALUATION.3IL84	3IL84	Urbana, IL	1983-1984	464	463	Hundrad seed weight		SOYBEAN.EVALUATION.3IL83.2	3IL83.2	Urbana, IL	1982-1983	192	Flowering date		SOYBEAN.EVALUATION.3IL83.1	3IL83.1	Urbana, IL	1982-1983	625	Maturity date
SOYBEAN.EVALUATION.3MN83.1	3MN83.1	St, Paul, MN	1982-1983	188	NA	Hundrad seed weight		SOYBEAN.EVALUATION.3IL84	3IL84	Urbana, IL	1983-1984	464	Flowering date		SOYBEAN.EVALUATION.3IL83.2	3IL83.2	Urbana, IL	1982-1983	192	Maturity date
SOYBEAN.EVALUATION.3MN83.2	3MN83.2	St, Paul, MN	1982-1983	405	405	Hundrad seed weight		SOYBEAN.EVALUATION.3MN83.1	3MN83.1	St, Paul, MN	1982-1983	188	Flowering date		SOYBEAN.EVALUATION.3IL84	3IL84	Urbana, IL	1983-1984	464	Maturity date
SOYBEAN.EVALUATION.4IL87	4IL87	Urbana, IL	1986-1987	482	479	Hundrad seed weight		SOYBEAN.EVALUATION.3MN83.2	3MN83.2	St, Paul, MN	1982-1983	405	Flowering date		SOYBEAN.EVALUATION.3MN83.1	3MN83.1	St, Paul, MN	1982-1983	188	Maturity date
SOYBEAN.EVALUATION.4MN87	4MN87	st, Paul, MN	1986-1987	74	NA	Hundrad seed weight		SOYBEAN.EVALUATION.4IL87	4IL87	Urbana, IL	1986-1987	482	Flowering date		SOYBEAN.EVALUATION.3MN83.2	3MN83.2	St, Paul, MN	1982-1983	405	Maturity date
SOYBEAN.EVALUATION.5IL90	5IL90	Urbana, IL	1989-1990	547	529	Hundrad seed weight		SOYBEAN.EVALUATION.4MN87	4MN87	st, Paul, MN	1986-1987	74	Flowering date		SOYBEAN.EVALUATION.4IL87	4IL87	Urbana, IL	1986-1987	482	Maturity date
SOYBEAN.EVALUATION.5MN90	5MN90	St, Paul, MN	1989-1990	43	NA	Hundrad seed weight		SOYBEAN.EVALUATION.5IL90	5IL90	Urbana, IL	1989-1990	547	Flowering date		SOYBEAN.EVALUATION.4MN87	4MN87	st, Paul, MN	1986-1987	74	Maturity date
SOYBEAN.EVALUATION.IL0102	IL0102	Urbana, IL	2001-2002	1170	1170	Hundrad seed weight		SOYBEAN.EVALUATION.5MN90	5MN90	St, Paul, MN	1989-1990	43	Flowering date		SOYBEAN.EVALUATION.5IL90	5IL90	Urbana, IL	1989-1990	547	Maturity date
SOYBEAN.EVALUATION.IL2011_12_13	IL2011_12_13	Urbana, IL	2011	395		Hundrad seed weight		SOYBEAN.EVALUATION.IL0102	IL0102	Urbana, IL	2001-2002	1170	Flowering date		SOYBEAN.EVALUATION.5MN90	5MN90	St, Paul, MN	1989-1990	43	Maturity date
SOYBEAN.EVALUATION.IL945	IL945	urbana, IL	1994-1995	1015	1013	Hundrad seed weight		SOYBEAN.EVALUATION.IL2011_12_13	IL2011_12_13	Urbana, IL	2011	395	Flowering date		SOYBEAN.EVALUATION.IL0102	IL0102	Urbana, IL	2001-2002	1170	Maturity date
SOYBEAN.EVALUATION.MN0102	MN0102	St, Paul, MN	2001-2002	491	491	Hundrad seed weight		SOYBEAN.EVALUATION.IL945	IL945	urbana, IL	1994-1995	1015	Flowering date		SOYBEAN.EVALUATION.IL2011_12_13	IL2011_12_13	Urbana, IL	2011	395	Maturity date
SOYBEAN.EVALUATION.MN945	MN945	St. Paul, MN	1994-1995	330	330	Hundrad seed weight		SOYBEAN.EVALUATION.MN0102	MN0102	St, Paul, MN	2001-2002	491	Flowering date		SOYBEAN.EVALUATION.IL945	IL945	urbana, IL	1994-1995	1015	Maturity date
SOYBEAN.EVALUATION.MS1999_01	MS1999_01	Stoneville,MS	1999	1058	1058	Hundrad seed weight		SOYBEAN.EVALUATION.MN945	MN945	St. Paul, MN	1994-1995	330	Flowering date		SOYBEAN.EVALUATION.MN0102	MN0102	St, Paul, MN	2001-2002	491	Maturity date
SOYBEAN.EVALUATION.MS2000_02	MS2000_02	Stoneville,MS	2000	841	841	Hundrad seed weight		SOYBEAN.EVALUATION.MS1999_01	MS1999_01	Stoneville,MS	1999	1058	Flowering date		SOYBEAN.EVALUATION.MN945	MN945	St. Paul, MN	1994-1995	330	Maturity date
SOYBEAN.EVALUATION.MS2001_02	MS2001_02	Stoneville,MS	2001	277	277	Hundrad seed weight		SOYBEAN.EVALUATION.MS2000_02	MS2000_02	Stoneville,MS	2000	841	Flowering date		SOYBEAN.EVALUATION.MS1999_01	MS1999_01	Stoneville,MS	1999	1058	Maturity date
SOYBEAN.EVALUATION.MS2001_03	MS2001_03	Stoneville,MS	2001	210	210	Hundrad seed weight		SOYBEAN.EVALUATION.MS2001_02	MS2001_02	Stoneville,MS	2001	277	Flowering date		SOYBEAN.EVALUATION.MS2000_02	MS2000_02	Stoneville,MS	2000	841	Maturity date
SOYBEAN.EVALUATION.MS2011_12	MS2011_12	Stoneville,MS	2011	537		Hundrad seed weight		SOYBEAN.EVALUATION.MS2001_03	MS2001_03	Stoneville,MS	2001	210	Flowering date		SOYBEAN.EVALUATION.MS2001_02	MS2001_02	Stoneville,MS	2001	277	Maturity date
SOYBEAN.EVALUATION.MS923	MS923	Stoneville, MS	1992-1993	798	797	Hundrad seed weight		SOYBEAN.EVALUATION.MS2011_12	MS2011_12	Stoneville,MS	2011	537	Flowering date		SOYBEAN.EVALUATION.MS2001_03	MS2001_03	Stoneville,MS	2001	210	Maturity date
SOYBEAN.EVALUATION.MS945	MS945	Stoneville, MS	1994-1995	825	819	Hundrad seed weight		SOYBEAN.EVALUATION.MS923	MS923	Stoneville, MS	1992-1993	798	Flowering date		SOYBEAN.EVALUATION.MS2011_12	MS2011_12	Stoneville,MS	2011	537	Maturity date
SOYBEAN.EVALUATION.MS967	MS967	Stoneville, MS	1996-1997	1174	1173	Hundrad seed weight		SOYBEAN.EVALUATION.MS945	MS945	Stoneville, MS	1994-1995	825	Flowering date		SOYBEAN.EVALUATION.MS923	MS923	Stoneville, MS	1992-1993	798	Maturity date
SOYBEAN.EVALUATION.MS989	MS989	Stoneville, MS	1998-1999	425	425	Hundrad seed weight		SOYBEAN.EVALUATION.MS967	MS967	Stoneville, MS	1996-1997	1174	Flowering date		SOYBEAN.EVALUATION.MS945	MS945	Stoneville, MS	1994-1995	825	Maturity date
SOYBEAN.EXPIREDPVP	EXPIREDPVP			23		Hundrad seed weight		SOYBEAN.EVALUATION.MS989	MS989	Stoneville, MS	1998-1999	426	Flowering date		SOYBEAN.EVALUATION.MS967	MS967	Stoneville, MS	1996-1997	1174	Maturity date
SOYBEAN.GENERAL	GENERAL	Illinois		171		Hundrad seed weight		SOYBEAN.GENERAL	SOYBEAN.GENERAL			174	Flowering date		SOYBEAN.EVALUATION.MS989	MS989	Stoneville, MS	1998-1999	426	Maturity date
WILD.SOYBEAN.EVAL.1IL85	1IL85	Urbana, IL	1985	197	196	Hundrad seed weight		WILD.SOYBEAN.EVAL.1IL85	1IL85	Urbana, IL	1985	197	Flowering date		SOYBEAN.GENERAL	SOYBEAN.GENERAL			165	Maturity date
															WILD.SOYBEAN.EVAL.1IL85	WILD.SOYBEAN.EVAL.1IL85	Urbana, IL	1985	197	Maturity date
phenotype method	Abbreviation	Locaition	Year	accession number	Accession number of GWAS	Traits
DEVELOPER.DATA	DEVELOPER.DATA				NA	Reproductive period length
SOYBEAN.EVALUATION.1IL64	1IL64	Urbana, IL	1964		724	Reproductive period length
SOYBEAN.EVALUATION.1IL66	1IL66	Urbana, IL	1965-1966		1143	Reproductive period length
SOYBEAN.EVALUATION.1MN63	1MN63	St, Paul, MN	1963		287	Reproductive period length
SOYBEAN.EVALUATION.2IL81.1	2IL81.1	Urbana, IL	1980-1981		847	Reproductive period length
SOYBEAN.EVALUATION.2IL81.2	2IL81.2	Urbana, IL	1980-1981		784	Reproductive period length
SOYBEAN.EVALUATION.2KY81	2KY81	Lexington,KY	1980-1981		786	Reproductive period length
SOYBEAN.EVALUATION.2MN81	2MN81	st, Paul, MN	1980-1981		362	Reproductive period length
SOYBEAN.EVALUATION.3IL83.1	3IL83.1	Urbana, IL	1982-1983		623	Reproductive period length
SOYBEAN.EVALUATION.3IL83.2	3IL83.2	Urbana, IL	1982-1983		NA	Reproductive period length
SOYBEAN.EVALUATION.3IL84	3IL84	Urbana, IL	1983-1984		463	Reproductive period length
SOYBEAN.EVALUATION.3MN83.1	3MN83.1	St, Paul, MN	1982-1983		NA	Reproductive period length
SOYBEAN.EVALUATION.3MN83.2	3MN83.2	St, Paul, MN	1982-1983		405	Reproductive period length
SOYBEAN.EVALUATION.4IL87	4IL87	Urbana, IL	1986-1987		479	Reproductive period length
SOYBEAN.EVALUATION.4MN87	4MN87	st, Paul, MN	1986-1987		NA	Reproductive period length
SOYBEAN.EVALUATION.5IL90	5IL90	Urbana, IL	1989-1990		529	Reproductive period length
SOYBEAN.EVALUATION.5MN90	5MN90	St, Paul, MN	1989-1990		NA	Reproductive period length
SOYBEAN.EVALUATION.IL0102	IL0102	Urbana, IL	2001-2002		1169	Reproductive period length
SOYBEAN.EVALUATION.IL2011_12_13	IL2011_12_13	Urbana, IL	2011			Reproductive period length
SOYBEAN.EVALUATION.IL945	IL945	urbana, IL	1994-1995		1013	Reproductive period length
SOYBEAN.EVALUATION.MN0102	MN0102	St, Paul, MN	2001-2002		491	Reproductive period length
SOYBEAN.EVALUATION.MN945	MN945	St. Paul, MN	1994-1995		330	Reproductive period length
SOYBEAN.EVALUATION.MS1999_01	MS1999_01	Stoneville,MS	1999		1058	Reproductive period length
SOYBEAN.EVALUATION.MS2000_02	MS2000_02	Stoneville,MS	2000		841	Reproductive period length
SOYBEAN.EVALUATION.MS2001_02	MS2001_02	Stoneville,MS	2001		277	Reproductive period length
SOYBEAN.EVALUATION.MS2001_03	MS2001_03	Stoneville,MS	2001		210	Reproductive period length
SOYBEAN.EVALUATION.MS2011_12	MS2011_12	Stoneville,MS	2011			Reproductive period length
SOYBEAN.EVALUATION.MS923	MS923	Stoneville, MS	1992-1993		797	Reproductive period length
SOYBEAN.EVALUATION.MS945	MS945	Stoneville, MS	1994-1995		819	Reproductive period length
SOYBEAN.EVALUATION.MS967	MS967	Stoneville, MS	1996-1997		1173	Reproductive period length
SOYBEAN.EVALUATION.MS989	MS989	Stoneville, MS	1998-1999		426	Reproductive period length
SOYBEAN.EXPIREDPVP	EXPIREDPVP					Reproductive period length
SOYBEAN.GENERAL	GENERAL	Illinois				Reproductive period length
WILD.SOYBEAN.EVAL.1IL85	1IL85	Urbana, IL	1985		196	Reproductive period length
SOYBEANMAINT2016CR			2016		406	Reproductive period length

## Sheet: Table_S2
Table S2 The Pearson correlation between hundred seed weight and productive period length
Dataset (Environments)	Sample size	Pearson Correlation	P-value
WILD.SOYBEAN.EVAL.1IL85	195	0.337109	1.27261e-06
SOYBEAN.EVALUATION.1IL64	722	0.404321	7.54442e-30
SOYBEAN.EVALUATION.MS1999_01	1056	0.276522	5.04561e-20
SOYBEAN.EVALUATION.MS923	796	0.648234	2.63808e-96
SOYBEAN.GENERAL	148	0.283355	0.000442005
SOYBEAN.EVALUATION.MS945	823	0.66426	4.01629e-106
SOYBEAN.EVALUATION.2IL81.2	784	0.387316	1.5597e-29
SOYBEAN.EVALUATION.2KY81	786	0.481254	6.37719e-47
SOYBEAN.EVALUATION.2IL81.1	851	0.369055	6.4577e-29
SOYBEAN.EVALUATION.3MN83.2	403	0.560694	6.59301e-35
SOYBEAN.EVALUATION.3IL83.2	190	0.228525	0.00143187
SOYBEAN.EVALUATION.4IL87	480	0.454367	6.28321e-26
SOYBEAN.EVALUATION.MS2000_02	839	0.449264	5.15794e-43
SOYBEAN.EVALUATION.MN945	328	0.231709	2.12606e-05
SOYBEAN.EVALUATION.IL945	1013	0.244476	2.80333e-15
SOYBEAN.EVALUATION.2MN81	362	-0.131982	0.0117211
SOYBEAN.EVALUATION.IL0102	1168	0.274868	9.99755e-22
SOYBEAN.EVALUATION.MS967	1172	0.18041	4.78259e-10
SOYBEAN.EVALUATION.MS989	423	0.348868	1.31312e-13
SOYBEAN.EVALUATION.MS2001_02	275	0.300592	3.42116e-07
SOYBEAN.EVALUATION.MS2001_03	208	0.377159	1.67396e-08
SOYBEAN.EVALUATION.1IL66	1141	0.418301	1.24231e-49
SOYBEAN.EVALUATION.3IL83.1	623	0.241411	9.7259e-10
SOYBEAN.EVALUATION.1MN63	285	0.0663414	0.262618
SOYBEAN.EVALUATION.MN0102	489	0.465565	8.80109e-28
SOYBEAN.EVALUATION.3MN83.1	186	0.00989144	0.892831
SOYBEAN.EVALUATION.5IL90	545	0.317582	2.77347e-14
SOYBEAN.EVALUATION.3IL84	462	0.477039	9.62946e-28
SOYBEAN.EVALUATION.5MN90	41	0.0742737	0.635965
SOYBEAN.EVALUATION.4MN87	72	0.0582515	0.622022

## Sheet: Table_S3
Table S3 The correlation between traits and geographic locations
Traits	Geographic_factors	Germplasm_type	Correlation	P-value
RPL	Longitude	Glycine max	0.238407	2.2e-16
RPL	Latitude	Glycine max	-0.220292	2.2e-16
RPL	Longitude	Glycine soja	0.190637	7.346e-10
RPL	Latitude	Glycine soja	-0.142345	4.661e-06
RPL	Longitude	All	0.116138	< 2.2e-16
RPL	Latitude	All	-0.22278	< 2.2e-16
HSW	Latitude	All	0.0252055	0.04446
HSW	Longitude	All	0.266966	< 2.2e-16
HSW	Latitude	Glycine soja	0.00842631	0.9166
HSW	Longitude	Glycine soja	0.303165	0.0001136
HSW	Latitude	Glycine max	0.0739055	5.657e-09
HSW	Longitude	Glycine max	0.295437	< 2.2e-16

## Sheet: Table_S4
Table S4 Candidate genes for associations of HSW
Chromsome	Start	End	Gene_ID	ortholog_in_arabidopsis	Gene annotation
Chr07	4557779	4559942	Glyma.07G052300	AT2G46660	cytochrome P450, family 78, subfamily A, polypeptide 6
Chr16	1996084	1998423	Glyma.16G021200	AT2G46660	cytochrome P450, family 78, subfamily A, polypeptide 6
Chr19	50232126	50234284	Glyma.19G258700	AT2G46660	cytochrome P450, family 78, subfamily A, polypeptide 6
Chr01	8436335	8438675	Glyma.01G061100	AT1G13710	cytochrome P450, family 78, subfamily A, polypeptide 5
Chr02	11775036	11777459	Glyma.02G119600	AT1G13710	cytochrome P450, family 78, subfamily A, polypeptide 5
Chr05	34110351	34112934	Glyma.05G147100	AT1G13710	cytochrome P450, family 78, subfamily A, polypeptide 5
Chr06	49935880	49942031	Glyma.06G310800	AT1G13710	cytochrome P450, family 78, subfamily A, polypeptide 5
Chr08	7993317	7995690	Glyma.08G104100	AT1G13710	cytochrome P450, family 78, subfamily A, polypeptide 5
Chr11	34197391	34199638	Glyma.11G250200	AT1G13710	cytochrome P450, family 78, subfamily A, polypeptide 5
Chr19	48875685	48878034	Glyma.19G240800	AT1G13710	cytochrome P450, family 78, subfamily A, polypeptide 5
Chr09	6120899	6127022	Glyma.09G063700	AT2G19500	cytokinin oxidase 2
Chr03	43993495	43996440	Glyma.03G241700	AT3G21510	histidine-containing phosphotransmitter 1
Chr07	43033595	43035703	Glyma.07G253100	AT3G21510	histidine-containing phosphotransmitter 1
Chr10	39191358	39192971	Glyma.10G157800	AT3G21510	histidine-containing phosphotransmitter 1
Chr13	32634204	32636454	Glyma.13G212800	AT3G21510	histidine-containing phosphotransmitter 1
Chr13	41250279	41252854	Glyma.13G317900	AT3G21510	histidine-containing phosphotransmitter 1
Chr15	7769257	7771694	Glyma.15G099800	AT3G21510	histidine-containing phosphotransmitter 1
Chr19	48756071	48759574	Glyma.19G239100	AT3G21510	histidine-containing phosphotransmitter 1
Chr20	46467141	46468810	Glyma.20G230800	AT3G21510	histidine-containing phosphotransmitter 1
Chr01	813496	815748	Glyma.01G008300	AT3G16360	HPT phosphotransmitter 4
Chr06	6810889	6814220	Glyma.06G088100	AT3G16360	HPT phosphotransmitter 4
Chr07	1226239	1228542	Glyma.07G015600	AT3G16360	HPT phosphotransmitter 4
Chr08	16266131	16268320	Glyma.08G201100	AT3G16360	HPT phosphotransmitter 4
Chr13	44304970	44306250	Glyma.13G354700	AT3G16360	HPT phosphotransmitter 4
Chr15	1521589	1523186	Glyma.15G019500	AT3G16360	HPT phosphotransmitter 4
Chr02	15527472	15531011	Glyma.02G150800	AT1G03430	histidine-containing phosphotransfer factor 5
Chr03	36431048	36432254	Glyma.03G148600	AT1G03430	histidine-containing phosphotransfer factor 5
Chr10	2018122	2021709	Glyma.10G023200	AT1G03430	histidine-containing phosphotransfer factor 5
Chr11	25926613	25930356	Glyma.11G187300	AT1G03430	histidine-containing phosphotransfer factor 5
Chr19	41241439	41243759	Glyma.19G151900	AT1G03430	histidine-containing phosphotransfer factor 5
Chr02	48055694	48067169	Glyma.02G305900	AT5G35750	histidine kinase 2
Chr14	562316	574596	Glyma.14G007100	AT5G35750	histidine kinase 2
Chr05	34230596	34238516	Glyma.05G148100	AT1G27320	histidine kinase 3
Chr08	8079687	8087576	Glyma.08G105000	AT1G27320	histidine kinase 3
Chr02	7559422	7567585	Glyma.02G087000	AT2G01830	CHASE domain containing histidine kinase protein
Chr05	41654978	41662988	Glyma.05G241600	AT2G01830	CHASE domain containing histidine kinase protein
Chr07	19882111	19885620	Glyma.07G158800	AT2G01830	CHASE domain containing histidine kinase protein
Chr07	30829199	30837605	Glyma.07G173700	AT2G01830	CHASE domain containing histidine kinase protein
Chr08	3809172	3816534	Glyma.08G049000	AT2G01830	CHASE domain containing histidine kinase protein
Chr01	41350519	41351415	Glyma.01G120600	AT3G50660	Cytochrome P450 superfamily protein
Chr01	51219681	51224948	Glyma.01G175500	AT3G50660	Cytochrome P450 superfamily protein
Chr02	5151731	5157862	Glyma.02G057500	AT3G50660	Cytochrome P450 superfamily protein
Chr11	5084791	5089804	Glyma.11G067700	AT3G50660	Cytochrome P450 superfamily protein
Chr07	17209390	17210181	Glyma.07G144400	AT2G38050	3-oxo-5-alpha-steroid 4-dehydrogenase family protein
Chr11	715656	716447	Glyma.11G010000	AT2G38050	3-oxo-5-alpha-steroid 4-dehydrogenase family protein
Chr01	51435454	51437016	Glyma.01G178000	AT1G75080	Brassinosteroid signalling positive regulator (BZR1) family protein
Chr04	2687701	2689839	Glyma.04G033800	AT1G75080	Brassinosteroid signalling positive regulator (BZR1) family protein
Chr06	2613465	2615567	Glyma.06G034000	AT1G75080	Brassinosteroid signalling positive regulator (BZR1) family protein
Chr11	4849799	4851673	Glyma.11G064300	AT1G75080	Brassinosteroid signalling positive regulator (BZR1) family protein
Chr14	6448729	6452256	Glyma.14G076900	AT1G75080	Brassinosteroid signalling positive regulator (BZR1) family protein
Chr04	48926008	48930251	Glyma.04G218300	AT4G39400	Leucine-rich receptor-like protein kinase family protein
Chr06	12052122	12056526	Glyma.06G147600	AT4G39400	Leucine-rich receptor-like protein kinase family protein
Chr09	10809836	10810527	Glyma.09G086700	AT2G36270	Basic-leucine zipper (bZIP) transcription factor family protein
Chr10	7251656	7257879	Glyma.10G071700	AT2G36270	Basic-leucine zipper (bZIP) transcription factor family protein
Chr13	41148922	41151182	Glyma.13G317000	AT2G36270	Basic-leucine zipper (bZIP) transcription factor family protein
Chr19	45201612	45206816	Glyma.19G194500	AT2G36270	Basic-leucine zipper (bZIP) transcription factor family protein
Chr03	40842843	40844186	Glyma.03G199600	AT1G52340	NAD(P)-binding Rossmann-fold superfamily protein
Chr11	11960056	11963816	Glyma.11G151400	AT1G52340	NAD(P)-binding Rossmann-fold superfamily protein
Chr11	11999901	12003524	Glyma.11G151700	AT1G52340	NAD(P)-binding Rossmann-fold superfamily protein
Chr11	24722394	24723784	Glyma.11G180800	AT1G52340	NAD(P)-binding Rossmann-fold superfamily protein
Chr19	45433259	45434500	Glyma.19G197200	AT1G52340	NAD(P)-binding Rossmann-fold superfamily protein
Chr01	1790049	1792039	Glyma.01G018700	AT2G35230	hydroxyproline-rich glycoprotein family protein
Chr01	31515839	31517715	Glyma.01G096800	AT2G35230	VQ motif-containing protein
Chr08	35627645	35629488	Glyma.08G272000	AT2G35230	VQ motif-containing protein
Chr08	35632723	35638206	Glyma.08G272100	AT2G35230	VQ motif-containing protein
Chr08	35665488	35667249	Glyma.08G272200	AT2G35230	VQ motif-containing protein
Chr03	38951656	38961330	Glyma.03G176600	AT2G37260	WRKY family transcription factor family protein
Chr19	43672865	43681647	Glyma.19G177400	AT2G37260	WRKY family transcription factor family protein
Chr01	52343829	52347518	Glyma.01G188400	AT4G36920	Integrase-type DNA-binding superfamily protein
Chr05	21947029	21951107	Glyma.05G091200	AT4G36920	Integrase-type DNA-binding superfamily protein
Chr10	29253589	29259287	Glyma.10G116600	AT4G36920	Integrase-type DNA-binding superfamily protein
Chr11	4048455	4052090	Glyma.11G053800	AT4G36920	Integrase-type DNA-binding superfamily protein
Chr17	15975184	15979979	Glyma.17G170300	AT4G36920	Integrase-type DNA-binding superfamily protein
Chr01	52990265	52994010	Glyma.01G195900	AT4G37750	Integrase-type DNA-binding superfamily protein
Chr04	3858052	3862348	Glyma.04G047900	AT4G37750	Integrase-type DNA-binding superfamily protein
Chr05	28773213	28777586	Glyma.05G108600	AT4G37750	Integrase-type DNA-binding superfamily protein
Chr06	3693119	3697685	Glyma.06G049200	AT4G37750	Integrase-type DNA-binding superfamily protein
Chr11	3414234	3418061	Glyma.11G045800	AT4G37750	Integrase-type DNA-binding superfamily protein
Chr14	8095484	8099513	Glyma.14G089200	AT4G37750	Integrase-type DNA-binding superfamily protein
Chr17	13595433	13600012	Glyma.17G158300	AT4G37750	Integrase-type DNA-binding superfamily protein
scaffold_44	4330	9453	Glyma.U037700	AT4G37750	Integrase-type DNA-binding superfamily protein
Chr03	40799933	40802102	Glyma.03G199000	AT5G06250	AP2/B3-like transcriptional factor family protein
Chr19	45373108	45375062	Glyma.19G196600	AT5G06250	AP2/B3-like transcriptional factor family protein
Chr14	6574806	6582066	Glyma.14G077800	AT1G19270	DA1
Chr17	40307962	40314691	Glyma.17G247700	AT1G19270	DA1
Chr01	51567665	51575443	Glyma.01G179800	AT4G36860	LIM domain-containing protein
Chr02	5388494	5395213	Glyma.02G059900	AT4G36860	LIM domain-containing protein
Chr10	16950857	16951360	Glyma.10G098200	AT4G36860	LIM domain-containing protein
Chr11	4720040	4726569	Glyma.11G062400	AT4G36860	LIM domain-containing protein
Chr12	28376204	28380326	Glyma.12G160000	AT4G36860	LIM domain-containing protein
Chr16	30141616	30148137	Glyma.16G142700	AT4G36860	LIM domain-containing protein
Chr13	36342871	36350571	Glyma.13G259100	AT1G78420	RING/U-box superfamily protein
Chr15	47470916	47481064	Glyma.15G249000	AT1G78420	RING/U-box superfamily protein
Chr11	10160457	10165565	Glyma.11G132700	AT3G63530	RING/U-box superfamily protein
Chr12	4152267	4157211	Glyma.12G057100	AT3G63530	RING/U-box superfamily protein
Chr12	39662181	39669545	Glyma.12G237700	AT3G63530	RING/U-box superfamily protein
Chr13	31727841	31735910	Glyma.13G203300	AT3G63530	RING/U-box superfamily protein
Chr13	43244791	43246867	Glyma.13G340400	AT3G63530	RING/U-box superfamily protein
Chr06	47479202	47486309	Glyma.06G286400	AT1G17110	ubiquitin-specific protease 15
Chr13	36413286	36421644	Glyma.13G259700	AT1G17110	ubiquitin-specific protease 15
Chr15	47333544	47342971	Glyma.15G248200	AT1G17110	ubiquitin-specific protease 15
Chr01	1528792	1532355	Glyma.01G015700	AT1G32310	plant-specific negative regulator of the APC/C complex
Chr09	43085878	43089297	Glyma.09G206700	AT1G32310	plant-specific negative regulator of the APC/C complex
Chr03	8306189	8315630	Glyma.03G058400	AT4G29040	regulatory particle AAA-ATPase 2A
Chr03	38542697	38547652	Glyma.03G170600	AT4G29040	regulatory particle AAA-ATPase 2A
Chr08	38083171	38085677	Glyma.08G280400	AT4G29040	regulatory particle AAA-ATPase 2A
Chr10	3853687	3857990	Glyma.10G043000	AT4G29040	regulatory particle AAA-ATPase 2A
Chr13	24321747	24326039	Glyma.13G130400	AT4G29040	regulatory particle AAA-ATPase 2A
Chr15	18316085	18316372	Glyma.15G183900	AT4G29040	regulatory particle AAA-ATPase 2A
Chr19	43286481	43291174	Glyma.19G171700	AT4G29040	regulatory particle AAA-ATPase 2A
Chr04	4593407	4599841	Glyma.04G056600	AT2G26300	G protein alpha subunit 1
Chr06	4306103	4312215	Glyma.06G057000	AT2G26300	G protein alpha subunit 1
Chr14	9247150	9255896	Glyma.14G098000	AT2G26300	G protein alpha subunit 1
Chr17	38112713	38121429	Glyma.17G226700	AT2G26300	G protein alpha subunit 1
Chr04	994284	1000318	Glyma.04G013100	AT4G34460	GTP binding protein beta 1
Chr06	966714	973712	Glyma.06G013000	AT4G34460	GTP binding protein beta 1
Chr11	9002830	9007396	Glyma.11G118500	AT4G34460	GTP binding protein beta 1
Chr12	3183449	3187542	Glyma.12G043900	AT4G34460	GTP binding protein beta 1
Chr07	3324393	3329481	Glyma.07G040200	AT5G20635	Encodes an atypical heterotrimeric G-protein gamma-subunit
Chr09	7152210	7155837	Glyma.09G070100	AT5G20635	Encodes an atypical heterotrimeric G-protein gamma-subunit
Chr13	22448850	22452188	Glyma.13G110900	AT5G20635	Encodes an atypical heterotrimeric G-protein gamma-subunit
Chr15	16972283	16975618	Glyma.15G178100	AT5G20635	Encodes an atypical heterotrimeric G-protein gamma-subunit
Chr17	3688017	3691527	Glyma.17G048600	AT5G20635	Encodes an atypical heterotrimeric G-protein gamma-subunit
Chr07	250358	252638	Glyma.07G003200	AT1G51660	mitogen-activated protein kinase kinase 4
Chr08	18127350	18129276	Glyma.08G223400	AT1G51660	mitogen-activated protein kinase kinase 4

## Sheet: Table_S5
Table S5 GWAS results for HSW and RPL and proposed candidate genes
Traits	SNP	Chromosome	Postion	P-value	MAF	method_name	QTL	PEV (%)	Effect	Candidate	Othologs	Gene_name	Gene_annoation
HSW	ss715579648	1	47937245	8.9163e-06	0.174235	IL945	C1P48	0.433243	0.742593
HSW	ss715579398	1	42672105	2.41942e-06	0.0144404	MS2001_02	C1P43	2.80438	-3.54423
HSW	ss715581902	2	30426734	4.80679e-07	0.0138203	IL945	C2P30	0.557963	-2.1891
HSW	ss715581917	2	30850687	1.59691e-07	0.0133268	IL945	C2P31	0.60547	-2.03914
HSW	ss715581147	2	13216888	1.66642e-06	0.0151515	MN945	C2P13	1.51169	4.36897
HSW	ss715582268	2	38472609	3.74814e-06	0.0636364	MN945	C2P38	1.40579	2.15226
HSW	ss715586669	3	4579967	6.22773e-08	0.0204082	2IL812	C3P5	0.768365	-2.54956
HSW	ss715585344	3	33517757	4.91674e-06	0.285714	3IL831	C3P33	0.899284	0.518468
HSW	ss715586034	3	39134285	6.0677e-07	0.0666667	MS2001_03	C3P39	5.66478	-2.45629	Glyma.03G176600	AT2G37260	TTG2	WRKY family transcription factor
HSW	ss715584819	3	2312508	9.40853e-06	0.0652174	MS967	C3P2	0.332716	-0.833306
HSW	ss715587823	4	39484148	2.06649e-06	0.465762	2IL811	C4P39	0.416059	0.984416
HSW	ss715588658	4	48924305	5.84756e-06	0.019337	2MN81	C4P49	1.64463	-2.62816	Glyma.04G218300	AT4G39400	BRI1	LRR-RLK; brassinosteroid receptor
HSW	ss715587882	4	3835527	1.50362e-07	0.377778	IL0102	C4P4	0.557784	0.599425	Glyma.04G047900	AT4G37750	ANT	AP2-like family transcription factor
HSW	ss715587174	4	15958592	1.95296e-06	0.092668	MN0102	C4P16	1.10717	1.42517
HSW	ss715587778	4	38051994	6.77077e-06	0.0409091	MN945	C4P38	1.32903	2.72631
HSW	ss715587797	4	38690809	1.98888e-06	0.0393939	MN945	C4P39	1.48851	-3.01906
HSW	ss715589314	4	7846335	5.7895e-06	0.0136364	MN945	C4P8	1.34931	4.1608
HSW	ss715587175	4	15988826	3.12738e-06	0.231047	MS2001_02	C4P16	2.73975	-1.30023
HSW	ss715587599	4	37650714	2.45787e-07	0.0180505	MS2001_02	C4P38	3.38761	2.43616
HSW	ss715588216	4	45465175	3.62906e-06	0.0126354	MS2001_02	C4P45	2.70236	1.97556
HSW	ss715590269	5	26446634	1.90559e-06	0.0138122	2MN81	C5P26	1.82233	-4.16826
HSW	ss715592451	5	8820984	5.65847e-08	0.0151934	2MN81	C5P9	2.39037	4.51988
HSW	ss715595178	6	50377967	5.41431e-07	0.0366812	1IL66	C6P50	0.541157	-1.19161	Glyma.06G310800	AT1G13710	KLU	CYP78A5 Cytochrome P450
HSW	ss715594464	6	44083402	6.61069e-06	0.0162455	MS2001_02	C6P44	2.55223	-2.95163
HSW	ss715595926	7	13175357	5.08675e-06	0.0106838	IL0102	C7P13	0.419456	1.84934
HSW	ss715604626	9	4312930	2.16592e-06	0.0290055	2MN81	C9P4	1.80195	-2.00943
HSW	ss715604560	9	45280778	5.5342e-06	0.143529	MS989	C9P45	1.54642	1.10251
HSW	ss715607220	10	42916550	1.05905e-06	0.0611465	2KY81	C10P43	0.445208	-1.93364
HSW	ss715606579	10	38197994	1.26706e-06	0.0121212	MN945	C10P38	1.54766	-5.14651
HSW	ss715608394	10	6241759	3.11516e-06	0.137879	MN945	C10P6	1.42989	1.96415
HSW	ss715608741	11	10304178	1.27814e-06	0.0160494	3MN832	C11P10	1.25856	-2.63114
HSW	ss715608784	11	10834171	1.42451e-06	0.0148148	3MN832	C11P11	1.24704	-2.66218
HSW	ss715610794	11	4869122	3.2298e-06	0.42906	IL0102	C11P5	0.437173	0.431374	Glyma.11G064300	AT1G75080	BZR1	Transcription factor
HSW	ss715608806	11	10996359	6.07074e-06	0.385714	MS2001_03	C11P11	4.60747	1.03179
HSW	ss715609570	11	12410973	5.83142e-07	0.0564706	MS989	C11P12	1.88005	-2.63638
HSW	ss715612237	12	32942770	1.90559e-06	0.0138122	2MN81	C12P33	1.82233	4.16826
HSW	ss715613620	12	8854648	7.82609e-06	0.0288809	MS2001_02	C12P9	2.51016	-2.18596
HSW	ss715614090	13	23652093	1.81619e-06	0.0421271	1IL64	C13P24	0.652736	0.993716
HSW	ss715614112	13	19586171	6.63032e-06	0.0133929	2IL812	C13P20	0.529359	-2.9426
HSW	ss715617662	14	13082150	7.11056e-06	0.0106061	MN945	C14P13	1.32269	-4.68974
HSW	ss715617971	14	24192109	1.57577e-06	0.0577617	MS2001_02	C14P24	2.91274	-1.72707
HSW	ss715618024	14	26079831	2.1677e-08	0.0559567	MS2001_02	C14P26	4.02073	2.17712
HSW	ss715618101	14	29087583	9.8132e-06	0.0740072	MS2001_02	C14P29	2.45387	-1.6699
HSW	ss715618123	14	30042508	2.45092e-08	0.0631769	MS2001_02	C14P30	3.98838	2.02371
HSW	ss715619733	14	6190533	3.63387e-07	0.0890878	MS967	C14P6	0.439867	-0.854374	Glyma.14G076900	AT1G75080	BZR1	Transcription factor
HSW	ss715618832	14	42990844	7.17227e-06	0.0917647	MS989	C14P43	1.50836	-1.35824
HSW	ss715623279	15	966358	5.93086e-06	0.227863	2MN81	C15P1	0.0587771	-0.208938
HSW	ss715620246	15	10798609	6.60332e-06	0.0121212	MN945	C15P11	1.33227	-3.93783
HSW	ss715625200	16	5344074	1.79678e-06	0.0108303	MS2001_02	C16P5	2.87952	3.83315
HSW	ss715625609	16	8291403	5.37902e-06	0.0213675	MS945	C16P8	0.386672	-1.78315
HSW	ss715626489	17	2419489	2.45487e-06	0.466919	5IL90	C17P2	2.04799	1.14294
HSW	ss715628293	17	8364226	2.54865e-06	0.0965812	IL0102	C17P8	0.446427	0.615231
HSW	ss715627531	17	38814314	1.26706e-06	0.0121212	MN945	C17P39	1.54766	-5.14651	Glyma.17G226700	AT2G26300	GPA1	An alpha subunit of a heterotrimeric GTP-binding protein
HSW	ss715628208	17	7786337	5.27477e-06	0.0270758	MS2001_02	C17P8	2.60863	2.10576
HSW	ss715628420	18	1027785	7.78729e-07	0.101519	1IL64	C18P1	0.673793	1.01182
HSW	ss715632525	18	6406710	8.62978e-06	0.0421271	1IL64	C18P6	0.544601	1.25694
HSW	ss715632749	18	819910	4.03971e-06	0.266575	1IL64	C18P8	0.585169	0.782654
HSW	ss715630985	18	44859032	8.65476e-06	0.0777293	1IL66	C18P45	0.425449	1.05249
HSW	ss715632307	18	56236088	5.49637e-06	0.0786026	1IL66	C18P56	0.444293	0.841877
HSW	ss715631022	18	45043561	3.09037e-06	0.0577617	MS2001_02	C18P45	2.74274	-1.77758
HSW	ss715635605	19	46730866	3.90472e-06	0.207317	1MN63	C19P47	1.86274	-1.47342
HSW	ss715635294	19	43670133	1.98072e-06	0.0165746	2MN81	C19P44	1.81617	2.56506	Glyma.19G177400	AT2G37260	TTG2	WRKY family transcription factor
HSW	ss715635522	19	45657923	7.25997e-06	0.237569	2MN81	C19P46	1.61054	-1.09462	Glyma.19G194500	AT2G36270	ABI5	bZIP transcription factor
HSW	ss715635425	19	45204441	6.70896e-07	0.137879	MN945	C19P45	1.63148	2.57506	Glyma.19G197200	AT1G52340	ABA2	Short-chain dehydrogenase/reductase
HSW	ss715638215	20	41926660	4.75978e-08	0.0503827	2IL812	C20P42	0.782294	1.99728
HSW	ss715638072	20	40169260	2.1821e-06	0.0132383	MN0102	C20P40	1.0965	2.28884	Glyma.20G164100	AT5G60750	SCO4	CAAX amino terminal protease family protein
HSW	ss715639002	20	621282	1.26706e-06	0.0121212	MN945	C20P06	1.54766	-5.14651
HSW	ss715637908	20	37941728	5.6933e-06	0.0106061	MN945	C20P38	1.35148	5.23137
RPL	ss715579710	1	48268947	3.66996e-07	0.0431034	MAINT2016CR	C1P48	2.89084	5.12293	Glyma.01G146700	AT1G77210	GmSTP14	sugar transporter 14
RPL	ss715583364	2	47163459	8.25824e-06	0.115702	2IL811	C2P47	1.0734	-1.80706
RPL	ss715583200	2	45430915	5.51062e-07	0.0160099	MAINT2016CR	C2P45	2.80042	-9.92601
RPL	ss715587022	3	9286947	4.64041e-06	0.0414541	2IL812	C3P9	1.5881	1.85667
RPL	ss715585152	3	3227129	6.75393e-06	0.0242347	2IL812	C3P3	1.533	2.39622
RPL	ss715586469	3	44080219	1.66387e-06	0.0221311	MS989	C3P44	2.3906	-7.99361
RPL	ss715585915	3	38340724	6.32646e-06	0.228873	MS989	C3P38	2.09341	2.3681
RPL	ss715587808	4	39006019	6.12576e-08	0.489939	1IL66	C4P39	1.62	1.94042	Glyma.04G159300	AT5G60910	GmAGL8	AGAMOUS-like 8
RPL	ss715587834	4	39731223	3.84125e-07	0.489064	1IL66	C4P40	1.42161	-1.84527
RPL	ss715587831	4	39655962	1.40664e-08	0.451135	IL945	C4P40	1.7748	-2.42519
RPL	ss715587808	4	39006019	1.13526e-06	0.473346	IL945	C4P39	1.30079	2.08733	Glyma.04G159300	AT5G60910.1	GmAGL8	AGAMOUS-like 8
RPL	ss715587578	4	36944047	3.92565e-06	0.467917	IL945	C4P37	1.16852	1.89452
RPL	ss715587102	4	1283476	1.71893e-07	0.0212665	MS199901	C4P1	1.41	5.9846
RPL	ss715588860	4	4789744	5.62993e-08	0.0106557	MS989	C4P5	3.08838	10.6894	Glyma.04G058900	AT5G24930	GmCOL4	CONSTANS-like 4
RPL	ss715588655	4	48902672	2.66631e-06	0.0196721	MS989	C4P49	2.29452	-5.42985
RPL	ss715590736	5	32042010	7.14322e-06	0.183716	4IL87	C5P32	1.66223	2.09781
RPL	ss715591020	5	34493210	7.14936e-08	0.0899015	MAINT2016CR	C5P34	3.25733	-7.50089	Glyma.05G148800	AT1G24260.2	GmAGL9	K-box region and MADS-box transcription factor family protein
RPL	ss715590219	5	24665482	1.1704e-06	0.0114754	MS989	C5P25	2.46246	-7.70947
RPL	ss715594573	6	46795225	5.33597e-07	0.0471939	2IL812	C6P47	1.90795	-2.43473	Glyma.06G196200	AT5G61380	GmTOC1	CCT motif -containing response regulator protein
RPL	ss715593340	6	15243517	4.17085e-06	0.0497449	2IL812	C6P15	1.60379	2.50446
RPL	ss715593757	6	17470006	9.30132e-09	0.0204918	MS989	C6P17	3.4645	-5.79239	Glyma.06G196200	AT5G61380	GmTOC1	CCT motif -containing response regulator protein
RPL	ss715598734	7	8032690	4.21921e-06	0.0245902	MS989	C7P8	2.20128	-5.97783
RPL	ss715599559	8	14306159	3.52794e-06	0.0966851	1IL64	C8P14	1.21507	-1.59276
RPL	ss715602120	8	43856824	6.80602e-06	0.0297265	MS200002	C8P44	1.6655	6.13601
RPL	ss715599890	8	17017611	1.66469e-06	0.103279	MS989	C8P17	2.3905	-2.19505
RPL	ss715603584	9	34103263	3.891e-06	0.036862	5IL90	C9P34	2.70335	4.13837	Glyma.09G137600	AT5G52400	GmCYP715A1	cytochrome P450
RPL	ss715604526	9	45015088	7.49572e-07	0.0114754	MS989	C9P45	2.55371	10.1289
RPL	ss715605139	9	5380457	2.11757e-06	0.0114754	MS989	C9P5	2.34144	-8.55484
RPL	ss715602973	9	11217463	6.4712e-06	0.0114754	MS989	C9P11	2.11465	7.78628	Glyma.09G088500	AT4G18130	GmPHYE	phytochrome E
RPL	ss715607475	10	45269968	4.95331e-14	0.298775	1IL66	C10P45	3.17329	-2.82701	Glyma.10G221500	AT1G22770	GmGI E2	gigantea protein (GI)
RPL	ss715607486	10	45325872	3.12645e-07	0.121606	2IL811	C10P45	1.41852	-2.39656	Glyma.10G221500	AT1G22770	GmGI E2	gigantea protein (GI)
RPL	ss715607495	10	45463820	5.84761e-07	0.0269461	IL0102	C10P45	0.99881	-3.60521	Glyma.10G221500	AT1G22770	GmGI (E2)	igantea protein (GI)
RPL	ss715607613	10	46706603	1.45802e-06	0.0560308	IL0102	C10P47	0.927713	3.53328	Glyma.10G240900	AT1G24260.1	AGL9	K-box region and MADS-box transcription factor family protein
RPL	ss715607471	10	45250482	2.04326e-08	0.183119	IL945	C10P45	1.73418	-2.11256	Glyma.10G221500	AT1G22770	GmGI (E2)	igantea protein (GI)
RPL	ss715608221	10	5132513	4.79205e-06	0.0188525	MS989	C10P5	2.17547	-4.87639
RPL	ss715608788	11	10877247	3.85726e-07	0.0224321	2IL811	C11P11	1.3962	3.30105	Glyma.U034500	AT5G60100	Tof11	pseudo-response regulator3
RPL	ss715610662	11	3997743	5.01915e-06	0.0123153	MAINT2016CR	C11P4	2.31388	-9.29729
RPL	ss715609673	11	2250505	6.16857e-06	0.100985	MAINT2016CR	C11P2	2.26891	4.517
RPL	ss715612746	12	37312140	6.98416e-07	0.0283149	1IL64	C12P37	1.39402	-3.56915
RPL	ss715613199	12	5684338	2.67711e-06	0.031768	1IL64	C12P6	1.24544	2.63087	Glyma.12G073900	AT5G02810	Tof12	pseudo-response regulator 7
RPL	ss715612493	12	34866915	1.42896e-06	0.0131148	MS989	C12P35	2.42167	8.43402
RPL	ss715615810	13	36792957	5.02191e-06	0.0320197	MAINT2016CR	C13P37	2.31377	5.58004
RPL	ss715617208	13	13888990	1.66916e-06	0.0188206	MS923	C13P14	1.21906	-3.65701
RPL	ss715613915	13	20169935	1.10509e-09	0.0122951	MS989	C13P20	3.91368	9.24008	Glyma.13G088100	AT1G78080	GmRAP2.4	related to AP2 4
RPL	ss715616149	13	40017050	3.36462e-08	0.0114754	MS989	C13P40	3.19558	12.5835
RPL	ss715615801	13	18315025	4.43422e-07	0.0155738	MS989	C13P18	2.66152	7.51121
RPL	ss715613882	13	4619580	6.38809e-06	0.0122951	MS989	C13P5	2.11727	6.76505
RPL	ss715616579	13	45076128	6.76345e-06	0.0163934	MS989	C13P45	2.10572	-6.35616
RPL	ss715617283	13	20939432	8.10766e-06	0.0139344	MS989	C13P21	2.06909	-7.3395	Glyma.13G093800	AT5G57660	GmCOL5	CONSTANS-like 5
RPL	ss715619063	14	45121058	8.27862e-10	0.0104384	4IL87	C14P45	3.16706	-8.13414
RPL	ss715617711	14	1361184	4.29615e-06	0.029615	IL945	C14P1	1.15894	4.06068	Glyma.14G019400	AT2G42830.2	GmAGL5	K-box region and MADS-box transcription factor family protein
RPL	ss715620326	15	11441207	2.78094e-09	0.0106557	MS989	C15P11	3.71855	13.3045	Glyma.15G140000	AT2G18790	GmPHYB	phytochrome B
RPL	ss715623266	15	9722426	8.56601e-07	0.0204918	MS989	C15P10	2.52636	-7.31756
RPL	ss715623163	15	872351	1.82092e-06	0.0655738	MS989	C15P1	2.3722	-2.85778
RPL	ss715620876	15	15009770	2.11757e-06	0.0114754	MS989	C15P15	2.34144	8.55484
RPL	ss715624394	16	31359859	3.60507e-06	0.405232	IL945	C16P31	1.17758	-1.28882	Glyma.16G151000	AT1G65480.1	GmFT	PEBP (phosphatidylethanolamine-binding protein) family protein
RPL	ss715624147	16	29571529	4.17772e-08	0.0106557	MS989	C16P30	3.15047	10.1844
RPL	ss715625419	16	7326244	5.01787e-06	0.0122951	MS989	C16P7	2.16614	-7.55521
RPL	ss715623568	16	17268611	8.11306e-06	0.0155738	MS989	C16P17	2.06896	-6.87889
RPL	ss715628133	17	7042685	1.66373e-06	0.0172131	MS989	C17P7	2.39062	7.51664
RPL	ss715626785	17	33652840	6.23042e-06	0.0172131	MS989	C17P34	2.12233	-6.76426
RPL	ss715627166	17	36914314	9.13362e-06	0.0131148	MS989	C17P37	2.04504	-5.99884
RPL	ss715631320	18	47964732	4.48582e-07	0.0124309	1IL64	C18P48	1.44322	3.69057
RPL	ss715631671	18	5576077	8.20275e-06	0.261106	IL945	C18P6	1.09037	1.34447
RPL	ss715630783	18	43535176	1.08122e-06	0.109606	MAINT2016CR	C18P44	2.6511	6.00937
RPL	ss715632962	18	974996	8.57051e-07	0.0188525	MS989	C18P1	2.52625	8.54273
RPL	ss715636105	19	5223535	1.78293e-06	0.148481	1IL64	C19P5	1.29027	2.19813
RPL	ss715635703	19	47632093	2.75568e-07	0.302275	1IL66	C19P47.5	1.4574	1.29027	Glyma.19G224200	AT1G09570	GmPHYA (E3)	phytochrome E3
RPL	ss715635647	19	47230973	2.42183e-06	0.413442	MN0102	C19P47	2.29878	-2.02646	Glyma.19G222000	AT1G09530.2	GmPIF3	phytochrome interacting factor 3
RPL	ss715635705	19	47636564	3.86637e-06	0.213849	MN0102	C19P47.5	2.20392	-2.02261	Glyma.19G224200	AT1G09570.1	GmPHYA (E3)	phytochrome A E3
RPL	ss715635726	19	47782613	6.56741e-06	0.406314	MN0102	C19P48	2.09688	1.92586	Glyma.19G224700	AT1G09530.1	GmPIF3	phytochrome interacting factor 3
RPL	ss715635077	19	41071216	3.79893e-08	0.0106557	MS989	C19P41	3.17027	-10.5335
RPL	ss715635786	19	48176686	3.70475e-07	0.0122951	MS989	C19P48.2	2.6985	7.61374	Glyma.19G224700	AT1G09530	GmPIF3	phytochrome interacting factor 3
RPL	ss715635221	19	42623644	5.08088e-07	0.0106557	MS989	C19P43	2.63353	-8.35667
RPL	ss715638370	20	42952890	3.94039e-08	0.0114754	MS989	C20P43	3.16265	-7.42968
RPL	ss715636767	20	12183348	4.70481e-08	0.0155738	MS989	C20P12	3.12573	-7.61312
RPL	ss715639057	20	20229461	1.92034e-07	0.0131148	MS989	C20P20	2.83403	-9.405
RPL	ss715636812	20	11072934	3.12575e-07	0.0114754	MS989	C20P11	2.73351	11.2594
RPL	ss715637431	20	34314607	3.02386e-06	0.0155738	MS989	C20P34	2.26893	6.12903	Glyma.20G090000	AT1G09570	GmPHYA (E4)	phytochrome A
RPL	ss715636739	20	12922198	3.37886e-06	0.0106557	MS989	C20P13	2.24637	10.2586
